# Supplementary material for: SARS-CoV-2 is associated with changes in brain structure in UK Biobank
Source: bioRxiv or medRxiv preprint supplement (doi:10.1101/2021.06.11.21258690), 2022-03-02
Supplement: Supplementary file [file media-1.pdf]

# Supplemental Table 1. Full list of reproducible IDPs used in the hypothesis-driven approach, and corresponding coordinates.

|                            |                      |                      |                                                                    |
|----------------------------|----------------------|----------------------|--------------------------------------------------------------------|
| r=0.01 Z=0.2 P=1.000 N=777 | Z=1.6 P2=1.000 N=480 | Z=1.3 P3=1.000 N=392 | REP=0.96 1 IDP_T1_FIRST_left_caudate_volume                        |
| r=0.00 Z=0.0 P=1.000 N=781 | Z=2.1 P2=1.000 N=392 | Z=0.4 P3=1.000 N=392 | REP=0.96 2 IDP_T1_FIRST_right_caudate_volume                       |
| r=0.03 Z=0.8 P=1.000 N=775 | Z=1.1 P2=1.000 N=397 | Z=1.3 P3=1.000 N=393 | REP=0.93 3 IDP_T1_FIRST_left_putamen_volume                        |
| r=0.01 Z=0.1 P=1.000 N=775 | Z=1.5 P2=1.000 N=398 | Z=1.7 P3=1.000 N=392 | REP=0.95 4 IDP_T1_FIRST_right_putamen_volume                       |
| r=0.11 Z=0.2 P=1.000 N=773 | Z=0.2 P2=1.000 N=398 | Z=1.2 P3=1.000 N=398 | REP=0.95 5 IDP_T1_FIRST_left_pallidum_volume                       |
| r=0.04 Z=1.2 P=1.000 N=776 | Z=0.9 P2=1.000 N=393 | Z=0.3 P3=1.000 N=391 | REP=0.96 6 IDP_T1_FIRST_right_pallidum_volume                      |
| r=0.03 Z=0.9 P=1.000 N=771 | Z=0.7 P2=1.000 N=396 | Z=0.2 P3=1.000 N=389 | REP=0.98 7 IDP_T1_FIRST_left_hippocampus_volume                    |
| r=0.02 Z=0.4 P=1.000 N=774 | Z=2.1 P2=1.000 N=393 | Z=0.9 P3=1.000 N=393 | REP=0.89 8 IDP_T1_FIRST_right_hippocampus_volume                   |
| r=0.01 Z=0.4 P=1.000 N=781 | Z=0.4 P2=1.000 N=402 | Z=0.2 P3=1.000 N=394 | REP=0.70 9 IDP_T1_FIRST_left_amygdala_volume                       |
| r=0.05 Z=1.1 P=1.000 N=778 | Z=1.1 P2=1.000 N=399 | Z=0.4 P3=1.000 N=394 | REP=0.68 10 IDP_T1_FIRST_right_amygdala_volume                     |
| r=0.02 Z=0.5 P=1.000 N=776 | Z=0.2 P2=1.000 N=401 | Z=0.3 P3=1.000 N=394 | REP=0.81 11 IDP_T1_FIRST_left_accumbens_volume                     |
| r=0.02 Z=0.5 P=1.000 N=779 | Z=1.7 P2=1.000 N=402 | Z=1.3 P3=1.000 N=392 | REP=0.88 12 IDP_T1_FIRST_right_accumbens_volume                    |
| r=0.07 Z=1.9 P=1.000 N=776 | Z=1.3 P2=1.000 N=398 | Z=0.6 P3=1.000 N=393 | REP=0.96 13 IDP_T1_FAST_ROIs_L_insular_cortex                      |
| r=0.07 Z=1.9 P=1.000 N=776 | Z=0.2 P2=1.000 N=398 | Z=0.6 P3=1.000 N=393 | REP=0.95 14 IDP_T1_FAST_ROIs_L_insular_cortex                      |
| r=0.01 Z=0.2 P=1.000 N=773 | Z=1.0 P2=1.000 N=400 | Z=1.1 P3=1.000 N=388 | REP=0.96 15 IDP_T1_FAST_ROIs_L_front_orb_cortex                    |
| r=0.04 Z=1.2 P=1.000 N=776 | Z=1.4 P2=1.000 N=400 | Z=0.4 P3=1.000 N=391 | REP=0.95 16 IDP_T1_FAST_ROIs_R_front_orb_cortex                    |
| r=0.05 Z=1.1 P=1.000 N=780 | Z=1.3 P2=1.000 N=401 | Z=0.4 P3=1.000 N=394 | REP=0.94 18 IDP_T1_FAST_ROIs_R_parahipp_gyrus_ant                  |
| r=0.02 Z=0.6 P=1.000 N=778 | Z=0.4 P2=1.000 N=400 | Z=0.1 P3=1.000 N=393 | REP=0.91 17 IDP_T1_FAST_ROIs_L_parahipp_gyrus_post                 |
| r=0.00 Z=0.1 P=1.000 N=778 | Z=0.1 P2=1.000 N=400 | Z=0.1 P3=1.000 N=393 | REP=0.95 20 IDP_T1_FAST_ROIs_R_parahipp_gyrus_post                 |
| r=0.07 Z=2.0 P=0.999 N=777 | Z=1.4 P2=1.000 N=401 | Z=0.6 P3=1.000 N=391 | REP=0.96 21 IDP_T1_FAST_ROIs_L_cent_operc_cortex                   |
| r=0.05 Z=1.4 P=1.000 N=773 | Z=0.2 P2=1.000 N=401 | Z=1.1 P3=1.000 N=394 | REP=0.96 22 IDP_T1_FAST_ROIs_R_cent_operc_cortex                   |
| r=0.04 Z=1.2 P=1.000 N=775 | Z=1.0 P2=1.000 N=400 | Z=0.6 P3=1.000 N=390 | REP=0.97 23 IDP_T1_FAST_ROIs_L_parietal_operc_cortex               |
| r=0.07 Z=1.6 P=1.000 N=775 | Z=1.5 P2=1.000 N=398 | Z=0.3 P3=1.000 N=392 | REP=0.96 24 IDP_T1_FAST_ROIs_R_parietal_operc_cortex               |
| r=0.03 Z=0.9 P=1.000 N=781 | Z=0.3 P2=1.000 N=398 | Z=0.4 P3=1.000 N=388 | REP=0.91 25 IDP_T1_FAST_ROIs_L_caudate                             |
| r=0.03 Z=0.9 P=1.000 N=756 | Z=0.9 P2=1.000 N=387 | Z=0.5 P3=1.000 N=382 | REP=0.93 26 IDP_T1_FAST_ROIs_R_caudate                             |
| r=0.05 Z=1.3 P=1.000 N=765 | Z=1.7 P2=1.000 N=393 | Z=1.2 P3=1.000 N=386 | REP=0.87 27 IDP_T1_FAST_ROIs_L_putamen                             |
| r=0.00 Z=0.0 P=1.000 N=770 | Z=0.7 P2=1.000 N=394 | Z=0.9 P3=1.000 N=396 | REP=0.87 28 IDP_T1_FAST_ROIs_R_putamen                             |
| r=0.00 Z=0.0 P=1.000 N=718 | Z=1.3 P2=1.000 N=363 | Z=1.4 P3=1.000 N=367 | REP=0.86 29 IDP_T1_FAST_ROIs_L_pallidum                            |
| r=0.04 Z=1.1 P=1.000 N=723 | Z=0.2 P2=1.000 N=365 | Z=0.8 P3=1.000 N=369 | REP=0.84 30 IDP_T1_FAST_ROIs_R_pallidum                            |
| r=0.02 Z=0.7 P=1.000 N=727 | Z=0.7 P2=1.000 N=360 | Z=1.1 P3=1.000 N=361 | REP=0.92 31 IDP_T1_FAST_ROIs_L_hippocampus                         |
| r=0.09 Z=2.4 P=0.927 N=775 | Z=1.9 P2=1.000 N=398 | Z=0.5 P3=1.000 N=392 | REP=0.94 32 IDP_T1_FAST_ROIs_R_hippocampus                         |
| r=0.02 Z=0.4 P=1.000 N=774 | Z=0.5 P2=1.000 N=398 | Z=0.9 P3=1.000 N=390 | REP=0.82 33 IDP_T1_FAST_ROIs_L_amygdala                            |
| r=0.01 Z=0.4 P=1.000 N=774 | Z=0.6 P2=1.000 N=399 | Z=1.1 P3=1.000 N=389 | REP=0.86 34 IDP_T1_FAST_ROIs_R_amygdala                            |
| r=0.02 Z=0.6 P=1.000 N=778 | Z=0.8 P2=1.000 N=402 | Z=0.8 P3=1.000 N=391 | REP=0.88 35 IDP_T1_FAST_ROIs_L_ventral_striatum                    |
| r=0.02 Z=0.7 P=1.000 N=778 | Z=0.8 P2=1.000 N=402 | Z=0.8 P3=1.000 N=391 | REP=0.87 36 IDP_T1_FAST_ROIs_R_ventral_striatum                    |
| r=0.02 Z=0.5 P=1.000 N=722 | Z=2.1 P2=0.997 N=367 | Z=2.3 P3=0.975 N=369 | REP=0.96 37 aseg_th_volume_Caudate                                 |
| r=0.05 Z=1.3 P=1.000 N=722 | Z=0.6 P2=1.000 N=368 | Z=0.3 P3=1.000 N=369 | REP=0.94 38 aseg_th_volume_Putamen                                 |
| r=0.02 Z=0.4 P=1.000 N=720 | Z=1.1 P2=1.000 N=367 | Z=0.8 P3=1.000 N=368 | REP=0.90 39 aseg_th_volume_Pallidum                                |
| r=0.06 Z=1.7 P=1.000 N=720 | Z=1.1 P2=1.000 N=367 | Z=0.7 P3=1.000 N=368 | REP=0.93 48 aseg_th_volume_Hippocampus                             |
| r=0.03 Z=0.8 P=1.000 N=717 | Z=0.1 P2=1.000 N=368 | Z=0.9 P3=1.000 N=364 | REP=0.87 41 aseg_th_volume_Amygdala                                |
| r=0.00 Z=0.1 P=1.000 N=720 | Z=0.2 P2=1.000 N=367 | Z=1.3 P3=1.000 N=367 | REP=0.82 42 aseg_th_volume_Accumbens-area                          |
| r=0.06 Z=1.6 P=1.000 N=723 | Z=1.2 P2=1.000 N=368 | Z=0.8 P3=1.000 N=369 | REP=0.96 43 aseg_th_volume_Caudate                                 |
| r=0.04 Z=1.0 P=1.000 N=722 | Z=0.6 P2=1.000 N=368 | Z=1.1 P3=1.000 N=368 | REP=0.94 44 aseg_th_volume_Putamen                                 |
| r=0.02 Z=0.7 P=1.000 N=721 | Z=1.1 P2=1.000 N=369 | Z=1.1 P3=1.000 N=369 | REP=0.91 45 aseg_th_volume_Pallidum                                |
| r=0.04 Z=1.0 P=1.000 N=721 | Z=1.6 P2=1.000 N=367 | Z=1.4 P3=1.000 N=366 | REP=0.94 46 aseg_th_volume_Hippocampus                             |
| r=0.02 Z=0.5 P=1.000 N=718 | Z=0.5 P2=1.000 N=367 | Z=0.9 P3=1.000 N=366 | REP=0.90 47 aseg_th_volume_Amygdala                                |
| r=0.01 Z=0.2 P=1.000 N=720 | Z=1.5 P2=1.000 N=366 | Z=0.1 P3=1.000 N=367 | REP=0.86 48 aseg_th_volume_Accumbens-area                          |
| r=0.08 Z=2.0 P=0.999 N=717 | Z=1.5 P2=1.000 N=364 | Z=0.7 P3=1.000 N=366 | REP=0.76 49 aseg_th_volume_Entorhinal                              |
| r=0.15 Z=2.4 P=0.815 N=723 | Z=2.7 P2=0.772 N=369 | Z=1.6 P3=1.000 N=369 | REP=0.94 50 aseg_th_volume_Lateralorbitofrontal                    |
| r=0.06 Z=1.6 P=1.000 N=720 | Z=1.1 P2=1.000 N=367 | Z=0.1 P3=1.000 N=366 | REP=0.81 51 aseg_th_volume_Medialorbitofrontal                     |
| r=0.09 Z=2.4 P=0.956 N=722 | Z=3.2 P2=0.417 N=369 | Z=2.0 P3=0.999 N=368 | REP=0.85 52 aseg_th_volume_Parahippocampal                         |
| r=0.09 Z=2.2 P=0.962 N=721 | Z=0.8 P2=1.000 N=367 | Z=0.8 P3=1.000 N=369 | REP=0.80 53 aseg_th_volume_Insula                                  |
| r=0.05 Z=1.3 P=1.000 N=721 | Z=0.2 P2=1.000 N=367 | Z=0.2 P3=1.000 N=366 | REP=0.77 54 aseg_th_volume_Entorhinal                              |
| r=0.04 Z=1.1 P=1.000 N=722 | Z=0.8 P2=1.000 N=368 | Z=0.6 P3=1.000 N=369 | REP=0.88 56 aseg_th_volume_Lateralorbitofrontal                    |
| r=0.05 Z=1.4 P=1.000 N=721 | Z=0.3 P2=1.000 N=368 | Z=0.6 P3=1.000 N=369 | REP=0.88 56 aseg_th_volume_Medialorbitofrontal                     |
| r=0.07 Z=1.9 P=1.000 N=722 | Z=1.0 P2=1.000 N=368 | Z=0.6 P3=1.000 N=369 | REP=0.88 56 aseg_th_volume_Parahippocampal                         |
| r=0.00 Z=0.0 P=1.000 N=718 | Z=0.1 P2=1.000 N=367 | Z=0.3 P3=1.000 N=366 | REP=0.82 58 aseg_th_volume_Insula                                  |
| r=0.12 Z=3.2 P=0.970 N=720 | Z=0.5 P2=1.000 N=365 | Z=0.5 P3=1.000 N=365 | REP=0.74 59 BA-exvivo_th_volume_Perirhinal                         |
| r=0.07 Z=1.5 P=1.000 N=721 | Z=2.3 P2=0.971 N=368 | Z=1.7 P3=1.000 N=370 | REP=0.93 68 BA-exvivo_th_volume_Entorhinal                         |
| r=0.09 Z=2.4 P=0.936 N=723 | Z=1.2 P2=1.000 N=368 | Z=0.2 P3=1.000 N=370 | REP=0.87 61 BA-exvivo_th_volume_Perirhinal                         |
| r=0.05 Z=1.5 P=1.000 N=725 | Z=1.2 P2=1.000 N=368 | Z=0.1 P3=1.000 N=365 | REP=0.82 62 BA-exvivo_th_volume_Entorhinal                         |
| r=0.13 Z=3.4 P=0.131 N=714 | Z=2.2 P2=0.986 N=364 | Z=0.7 P3=1.000 N=364 | REP=0.88 63 aseg_th_volume_Entorhinal                              |
| r=0.14 Z=3.7 P=0.058 N=723 | Z=2.3 P2=0.958 N=369 | Z=1.3 P3=1.000 N=369 | REP=0.92 64 aseg_th_volume_Lateralorbitofrontal                    |
| r=0.07 Z=1.9 P=1.000 N=716 | Z=1.8 P2=1.000 N=365 | Z=0.9 P3=1.000 N=368 | REP=0.85 65 aseg_th_volume_Medialorbitofrontal                     |
| r=0.12 Z=3.3 P=0.199 N=722 | Z=3.4 P2=0.280 N=369 | Z=2.0 P3=0.999 N=368 | REP=0.86 66 aseg_th_volume_Parahippocampal                         |
| r=0.10 Z=2.6 P=0.803 N=723 | Z=2.5 P2=0.875 N=368 | Z=1.9 P3=1.000 N=370 | REP=0.95 67 aseg_th_volume_Insula                                  |
| r=0.08 Z=2.1 P=0.807 N=721 | Z=0.4 P2=1.000 N=365 | Z=0.4 P3=1.000 N=366 | REP=0.74 68 aseg_th_volume_Entorhinal                              |
| r=0.05 Z=1.4 P=1.000 N=724 | Z=2.1 P2=0.996 N=369 | Z=1.8 P3=1.000 N=370 | REP=0.92 69 aseg_th_volume_Lateralorbitofrontal                    |
| r=0.03 Z=0.8 P=1.000 N=719 | Z=1.1 P2=1.000 N=368 | Z=1.3 P3=1.000 N=366 | REP=0.85 70 aseg_th_volume_Medialorbitofrontal                     |
| r=0.06 Z=1.7 P=1.000 N=722 | Z=1.1 P2=1.000 N=368 | Z=1.2 P3=1.000 N=366 | REP=0.85 71 aseg_th_volume_Parahippocampal                         |
| r=0.09 Z=2.3 P=0.974 N=723 | Z=0.6 P2=1.000 N=368 | Z=0.3 P3=1.000 N=370 | REP=0.94 72 aseg_th_volume_Insula                                  |
| r=0.04 Z=0.9 P=1.000 N=719 | Z=2.2 P2=0.982 N=367 | Z=2.3 P3=0.979 N=367 | REP=0.82 73 aseg_th_volume_2009s_th_volume_G-front-inf-Orbital     |
| r=0.07 Z=1.9 P=1.000 N=720 | Z=1.6 P2=1.000 N=365 | Z=0.7 P3=1.000 N=366 | REP=0.86 74 aseg_th_volume_2009s_th_volume_G-ins-ips-cent-ins      |
| r=0.05 Z=1.4 P=1.000 N=724 | Z=1.1 P2=1.000 N=369 | Z=0.5 P3=1.000 N=370 | REP=0.83 75 aseg_th_volume_2009s_th_volume_G-insular-short         |
| r=0.12 Z=3.2 P=0.276 N=725 | Z=2.1 P2=0.996 N=370 | Z=0.6 P3=1.000 N=370 | REP=0.86 76 aseg_th_volume_2009s_th_volume_G-occ-temp-med-Parahipp |
| r=0.12 Z=3.1 P=0.000 N=720 | Z=2.1 P2=0.987 N=369 | Z=1.7 P3=1.000 N=369 | REP=0.89 77 aseg_th_volume_2009s_th_volume_G-orbital               |
| r=0.01 Z=0.2 P=1.000 N=720 | Z=0.2 P2=1.000 N=368 | Z=0.2 P3=1.000 N=367 | REP=0.87 78 aseg_th_volume_2009s_th_volume_G-rectus                |
| r=0.08 Z=2.6 P=0.854 N=721 | Z=0.3 P2=1.000 N=369 | Z=0.3 P3=1.000 N=367 | REP=0.89 79 aseg_th_volume_2009s_th_volume_G-subcallosal           |
| r=0.04 Z=1.1 P=1.000 N=720 | Z=1.2 P2=1.000 N=366 | Z=0.9 P3=1.000 N=369 | REP=0.88 80 aseg_th_volume_2009s_th_volume_S-circular-insula-ent   |
| r=0.01 Z=0.3 P=1.000 N=728 | Z=0.4 P2=1.000 N=367 | Z=0.6 P3=1.000 N=368 | REP=0.89 81 aseg_th_volume_2009s_th_volume_S-circular-insula-inf   |
| r=0.04 Z=1.0 P=1.000 N=720 | Z=1.6 P2=1.000 N=369 | Z=1.5 P3=1.000 N=370 | REP=0.85 82 aseg_th_volume_2009s_th_volume_S-circular-insula-sup   |
| r=0.04 Z=1.1 P=1.000 N=721 | Z=1.0 P2=1.000 N=365 | Z=1.7 P3=1.000 N=366 | REP=0.87 84 aseg_th_volume_2009s_th_volume_S-orbital-lateral       |
| r=0.04 Z=1.1 P=1.000 N=721 | Z=0.1 P2=1.000 N=369 | Z=0.9 P3=1.000 N=367 | REP=0.74 84 aseg_th_volume_2009s_th_volume_S-orbital-med-olfact    |
| r=0.07 Z=1.5 P=1.000 N=720 | Z=0.2 P2=1.000 N=367 | Z=0.5 P3=1.000 N=368 | REP=0.85 85 aseg_th_volume_2009s_th_volume_S-orbital-Shaped        |
| r=0.07 Z=1.0 P=1.000 N=699 | Z=0.4 P2=1.000 N=355 | Z=0.5 P3=1.000 N=359 | REP=0.74 86 aseg_th_volume_2009s_th_volume_S-suborbital            |
| r=0.10 Z=2.6 P=0.854 N=721 | Z=0.3 P2=1.000 N=369 | Z=0.3 P3=1.000 N=367 | REP=0.81 87 aseg_th_volume_2009s_th_volume_G-front-inf-Orbital     |
| r=0.03 Z=0.8 P=1.000 N=714 | Z=0.2 P2=1.000 N=364 | Z=0.5 P3=1.000 N=364 | REP=0.86 88 aseg_th_volume_2009s_th_volume_G-ins-ips-cent-ins      |
| r=0.03 Z=0.8 P=1.000 N=720 | Z=1.2 P2=1.000 N=366 | Z=0.9 P3=1.000 N=369 | REP=0.88 88 aseg_th_volume_2009s_th_volume_S-circular-insula-ent   |
| r=0.01 Z=0.3 P=1.000 N=728 | Z=0.4 P2=1.000 N=367 | Z=0.6 P3=1.000 N=368 | REP=0.89 81 aseg_th_volume_2009s_th_volume_S-circular-insula-inf   |
| r=0.04 Z=1.0 P=1.000 N=720 | Z=1.6 P2=1.000 N=369 | Z=1.5 P3=1.000 N=370 | REP=0.85 82 aseg_th_volume_2009s_th_volume_S-circular-insula-sup   |
| r=0.04 Z=1.1 P=1.000 N=721 | Z=1.0 P2=1.000 N=365 | Z=1.7 P3=1.000 N=366 | REP=0.87 84 aseg_th_volume_2009s_th_volume_S-orbital-lateral       |
| r=0.04 Z=1.1 P=1.000 N=721 | Z=0.1 P2=1.000 N=369 | Z=0.9 P3=1.000 N=367 | REP=0.74 84 aseg_th_volume_2009s_th_volume_S-orbital-med-olfact    |
| r=0.07 Z=1.5 P=1.000 N=720 | Z=0.2 P2=1.000 N=367 | Z=0.5 P3=1.000 N=368 | REP=0.85 85 aseg_th_volume_2009s_th_volume_S-orbital-Shaped        |
| r=0.07 Z=1.0 P=1.000 N=699 | Z=0.4 P2=1.000 N=355 | Z=0.5 P3=1.000 N=359 | REP=0.74 86 aseg_th_volume_2009s_th_volume_S-suborbital            |
| r=0.10 Z=2.6 P=0.854 N=721 | Z=0.3 P2=1.000 N=369 | Z=0.3 P3=1.000 N=367 | REP=0.81 87 aseg_th_volume_2009s_th_volume_G-front-inf-Orbital     |
| r=0.03 Z=0.8 P=1.000 N=714 | Z=0.2 P2=1.000 N=364 | Z=0.5 P3=1.000 N=364 | REP=0.86 88 aseg_th_volume_2009s_th_volume_G-ins-ips-cent-ins      |
| r=0.03 Z=0.8 P=1.000 N=720 | Z=1.2 P2=1.000 N=366 | Z=0.9 P3=1.000 N=369 | REP=0.88 88 aseg_th_volume_2009s_th_volume_S-circular-insula-ent   |
| r=0.01 Z=0.3 P=1.000 N=728 | Z=0.4 P2=1.000 N=367 | Z=0.6 P3=1.000 N=368 | REP=0.89 81 aseg_th_volume_2009s_th_volume_S-circular-insula-inf   |
| r=0.04 Z=1.0 P=1.000 N=720 | Z=1.6 P2=1.000 N=369 | Z=1.5 P3=1.000 N=370 | REP=0.85 82 aseg_th_volume_2009s_th_volume_S-circular-insula-sup   |
| r=0.04 Z=1.1 P=1.000 N=721 | Z=1.0 P2=1.000 N=365 | Z=1.7 P3=1.000 N=366 | REP=0.87 84 aseg_th_volume_2009s_th_volume_S-orbital-lateral       |
| r=0.04 Z=1.1 P=1.000 N=721 | Z=0.1 P2=1.000 N=369 | Z=0.9 P3=1.000 N=367 | REP=0.74 84 aseg_th_volume_2009s_th_volume_S-orbital-med-olfact    |
| r=0.07 Z=1.5 P=1.000 N=720 | Z=0.2 P2=1.000 N=367 | Z=0.5 P3=1.000 N=368 | REP=0.85 85 aseg_th_volume_2009s_th_volume_S-orbital-Shaped        |
| r=0.07 Z=1.0 P=1.000 N=699 | Z=0.4 P2=1.000 N=355 | Z=0.5 P3=1.000 N=359 | REP=0.74 86 aseg_th_volume_2009s_th_volume_S-suborbital            |
| r=0.10 Z=2.6 P=0.854 N=721 | Z=0.3 P2=1.000 N=369 | Z=0.3 P3=1.000 N=367 | REP=0.81 87 aseg_th_volume_2009s_th_volume_G-front-inf-Orbital     |
| r=0.03 Z=0.8 P=1.000 N=714 | Z=0.2 P2=1.000 N=364 | Z=0.5 P3=1.000 N=364 | REP=0.86 88 aseg_th_volume_2009s_th_volume_G-ins-ips-cent-ins      |
| r=0.03 Z=0.8 P=1.000 N=720 | Z=1.2 P2=1.000 N=366 | Z=0.9 P3=1.000 N=369 | REP=0.88 88 aseg_th_volume_2009s_th_volume_S-circular-insula-ent   |
| r=0.01 Z=0.3 P=1.000 N=728 | Z=0.4 P2=1.000 N=367 | Z=0.6 P3=1.000 N=368 | REP=0.89 81 aseg_th_volume_2009s_th_volume_S-circular-insula-inf   |
| r=0.04 Z=1.0 P=1.000 N=720 | Z=1.6 P2=1.000 N=369 | Z=1.5 P3=1.000 N=370 | REP=0.85 82 aseg_th_volume_2009s_th_volume_S-circular-insula-sup   |
| r=0.04 Z=1.1 P=1.000 N=721 | Z=1.0 P2=1.000 N=365 | Z=1.7 P3=1.000 N=366 | REP=0.87 84 aseg_th_volume_2009s_th_volume_S-orbital-lateral       |
| r=0.04 Z=1.1 P=1.000 N=721 | Z=0.1 P2=1.000 N=369 | Z=0.9 P3=1.000 N=367 | REP=0.74 84 aseg_th_volume_2009s_th_volume_S-orbital-med-olfact    |
| r=0.07 Z=1.5 P=1.000 N=720 | Z=0.2 P2=1.000 N=367 | Z=0.5 P3=1.000 N=368 | REP=0.85 85 aseg_th_volume_2009s_th_volume_S-orbital-Shaped        |
| r=0.07 Z=1.0 P=1.000 N=699 | Z=0.4 P2=1.000 N=355 | Z=0.5 P3=1.000 N=359 | REP=0.74 86 aseg_th_volume_2009s_th_volume_S-suborbital            |
| r=0.10 Z=2.6 P=0.854 N=721 | Z=0.3 P2=1.000 N=369 | Z=0.3 P3=1.000 N=367 | REP=0.81 87 aseg_th_volume_2009s_th_volume_G-front-inf-Orbital     |
| r=0.03 Z=0.8 P=1.000 N=714 | Z=0.2 P2=1.000 N=364 | Z=0.5 P3=1.000 N=364 | REP=0.86 88 aseg_th_volume_2009s_th_volume_G-ins-ips-cent-ins      |
| r=0.03 Z=0.8 P=1.000 N=720 | Z=1.2 P2=1.000 N=366 | Z=0.9 P3=1.000 N=369 | REP=0.88 88 aseg_th_volume_2009s_th_volume_S-circular-insula-ent   |
| r=0.01 Z=0.3 P=1.000 N=728 | Z=0.4 P2=1.000 N=367 | Z=0.6 P3=1.000 N=368 | REP=0.89 81 aseg_th_volume_2009s_th_volume_S-circular-insula-inf   |
| r=0.04 Z=1.0 P=1.000 N=720 | Z=1.6 P2=1.000 N=369 | Z=1.5 P3=1.000 N=370 | REP=0.85 82 aseg_th_volume_2009s_th_volume_S-circular-insula-sup   |
| r=0.04 Z=1.1 P=1.000 N=721 | Z=1.0 P2=1.000 N=365 | Z=1.7 P3=1.000 N=366 | REP=0.87 84 aseg_th_volume_2009s_th_volume_S-orbital-lateral       |
| r=0.04 Z=1.1 P=1.000 N=721 | Z=0.1 P2=1.000 N=369 | Z=0.9 P3=1.000 N=367 | REP=0.74 84 aseg_th_volume_2009s_th_volume_S-orbital-med-olfact    |
| r=0.07 Z=1.5 P=1.000 N=720 | Z=0.2 P2=1.000 N=367 | Z=0.5 P3=1.000 N=368 | REP=0.85 85 aseg_th_volume_2009s                                   |

r=0.01 Z=-0.3 P=1.000 N=628 Z2=-1.5 P2=1.000 N=324 Z3=2.0 P3=0.997 N=313 REP=0.57 179 SN\_mean\_intensity\_modT2\_star\_threshold=0.3\_warpResolution=2mm  
r=0.01 Z=0.2 P=1.000 N=629 Z2=-0.2 P2=1.000 N=317 Z3=0.4 P3=1.000 N=314 REP=0.48 184 OC\_mean\_intensity\_modDTI\_FA\_threshold=0.3\_warpResolution=2mm  
r=0.01 Z=-0.2 P=1.000 N=631 Z2=-1.5 P2=1.000 N=352 Z3=-1.3 P3=1.000 N=344 REP=0.75 181 HT\_mean\_intensity\_modDTI\_FA\_threshold=0.3\_warpResolution=2mm  
r=0.03 Z=-0.7 P=1.000 N=631 Z2=-1.5 P2=1.000 N=358 Z3=-1.9 P3=1.000 N=343 REP=0.53 182 HT\_95th\_percentile\_modDTI\_FA\_threshold=0.3\_warpResolution=2mm  
r=0.03 Z=0.5 P=1.000 N=634 Z2=-0.7 P2=1.000 N=351 Z3=-1.3 P3=1.000 N=341 REP=0.63 183 OC\_mean\_intensity\_modDTI\_FA\_threshold=0.3\_warpResolution=2mm  
r=0.03 Z=-0.8 P=1.000 N=633 Z2=0.9 P2=1.000 N=351 Z3=-1.1 P3=1.000 N=344 REP=0.71 184 OC\_mean\_intensity\_modDTI\_FA\_threshold=0.3\_warpResolution=2mm  
r=0.02 Z=0.5 P=1.000 N=630 Z2=-0.6 P2=1.000 N=351 Z3=0.7 P3=1.000 N=341 REP=0.64 185 OC\_95th\_percentile\_modDTI\_FA\_threshold=0.3\_warpResolution=2mm  
r=0.05 Z=0.4 P=1.000 N=631 Z2=-0.7 P2=1.000 N=351 Z3=-0.7 P3=1.000 N=341 REP=0.78 186 OC\_mean\_intensity\_modDTI\_MD\_threshold=0.3\_warpResolution=2mm  
r=0.01 Z=0.4 P=1.000 N=675 Z2=-0.1 P2=1.000 N=351 Z3=-0.1 P3=1.000 N=336 REP=0.75 187 OC\_95th\_percentile\_modDTI\_MD\_threshold=0.3\_warpResolution=2mm  
r=0.05 Z=1.4 P=1.000 N=634 Z2=2.0 P2=0.996 N=353 Z3=2.3 P3=0.995 N=343 REP=0.87 188 SN\_mean\_intensity\_modNODDI\_ICVF\_threshold=0.3\_warpResolution=2mm  
r=0.04 Z=1.1 P=1.000 N=654 Z2=1.0 P2=1.000 N=352 Z3=0.8 P3=1.000 N=343 REP=0.66 189 OC\_mean\_intensity\_modNODDI\_ICVF\_threshold=0.3\_warpResolution=2mm  
r=0.05 Z=1.3 P=1.000 N=638 Z2=0.7 P2=1.000 N=351 Z3=0.8 P3=1.000 N=324 REP=0.58 190 OC\_95th\_percentile\_modNODDI\_ICVF\_threshold=0.3\_warpResolution=2mm  
r=0.06 Z=1.5 P=1.000 N=677 Z2=0.5 P2=1.000 N=352 Z3=0.4 P3=1.000 N=344 REP=0.74 191 HT\_mean\_intensity\_modNODDI\_ICVF\_threshold=0.3\_warpResolution=2mm  
r=0.03 Z=0.8 P=1.000 N=656 Z2=-0.7 P2=1.000 N=352 Z3=-0.4 P3=1.000 N=344 REP=0.76 192 OC\_95th\_percentile\_modNODDI\_ICVF\_threshold=0.3\_warpResolution=2mm  
r=0.01 Z=0.3 P=1.000 N=675 Z2=-0.5 P2=1.000 N=348 Z3=0.4 P3=1.000 N=339 REP=0.74 193 HT\_mean\_intensity\_modNODDI\_ICVF\_threshold=0.3\_warpResolution=2mm  
r=0.02 Z=0.6 P=1.000 N=663 Z2=-1.3 P2=1.000 N=352 Z3=-1.3 P3=1.000 N=343 REP=0.79 194 SN\_mean\_intensity\_modNODDI\_ICVF\_threshold=0.3\_warpResolution=2mm  
r=0.01 Z=0.3 P=1.000 N=669 Z2=0.5 P2=1.000 N=342 Z3=0.5 P3=1.000 N=339 REP=0.68 195 SN\_95th\_percentile\_modNODDI\_ICVF\_threshold=0.3\_warpResolution=2mm  
r=0.03 Z=0.7 P=1.000 N=685 Z2=-0.3 P2=1.000 N=353 Z3=-0.8 P3=1.000 N=344 REP=0.73 196 OC\_mean\_intensity\_modNODDI\_ICVF\_threshold=0.3\_warpResolution=2mm  
r=0.01 Z=-0.2 P=1.000 N=665 Z2=-0.4 P2=1.000 N=345 Z3=-0.9 P3=1.000 N=333 REP=0.51 197 OC\_95th\_percentile\_modNODDI\_ICVF\_threshold=0.3\_warpResolution=2mm  
r=0.00 Z=0.0 P=1.000 N=687 Z2=0.3 P2=1.000 N=311 Z3=0.3 P3=1.000 N=305 REP=0.66 198 ADM\_mean\_intensity\_modT2\_star\_threshold=0.3\_warpResolution=2mm  
r=0.00 Z=0.0 P=1.000 N=680 Z2=-1.4 P2=1.000 N=310 Z3=-1.4 P3=1.000 N=307 REP=0.62 199 ADM\_95th\_percentile\_modT2\_star\_threshold=0.3\_warpResolution=2mm  
r=0.02 Z=0.5 P=1.000 N=616 Z2=0.2 P2=1.000 N=315 Z3=-0.1 P3=1.000 N=310 REP=0.68 200 ADM\_gln\_modT2\_star\_threshold=0.3\_warpResolution=2mm  
r=0.01 Z=-0.4 P=1.000 N=605 Z2=0.5 P2=1.000 N=310 Z3=0.7 P3=1.000 N=304 REP=0.65 201 PIF\_mean\_intensity\_modT2\_star\_threshold=0.3\_warpResolution=2mm  
r=0.00 Z=0.0 P=1.000 N=613 Z2=-1.7 P2=1.000 N=314 Z3=-1.8 P3=1.000 N=308 REP=0.62 202 PIF\_95th\_percentile\_modT2\_star\_threshold=0.3\_warpResolution=2mm  
r=0.01 Z=-0.2 P=1.000 N=613 Z2=0.1 P2=1.000 N=314 Z3=0.2 P3=1.000 N=308 REP=0.69 203 PIF\_gln\_modT2\_star\_threshold=0.3\_warpResolution=2mm  
r=0.00 Z=0.0 P=1.000 N=604 Z2=0.6 P2=1.000 N=310 Z3=0.7 P3=1.000 N=303 REP=0.65 204 PIF\_mean\_intensity\_modT2\_star\_threshold=0.3\_warpResolution=2mm  
r=0.04 Z=1.0 P=1.000 N=615 Z2=2.0 P2=0.998 N=315 Z3=1.9 P3=1.000 N=309 REP=0.63 205 PIF\_95th\_percentile\_modT2\_star\_threshold=0.3\_warpResolution=2mm  
r=0.01 Z=0.2 P=1.000 N=687 Z2=0.7 P2=1.000 N=309 Z3=0.7 P3=1.000 N=307 REP=0.67 206 PIF\_gln\_modT2\_star\_threshold=0.3\_warpResolution=2mm  
r=0.01 Z=0.1 P=1.000 N=608 Z2=0.2 P2=1.000 N=312 Z3=0.2 P3=1.000 N=305 REP=0.67 207 TUB\_mean\_intensity\_modT2\_star\_threshold=0.3\_warpResolution=2mm  
r=0.01 Z=0.3 P=1.000 N=610 Z2=0.4 P2=1.000 N=310 Z3=0.4 P3=1.000 N=308 REP=0.57 208 TUB\_95th\_percentile\_modT2\_star\_threshold=0.3\_warpResolution=2mm  
r=0.02 Z=0.5 P=1.000 N=617 Z2=1.0 P2=1.000 N=317 Z3=0.4 P3=1.000 N=309 REP=0.69 209 TUB\_gln\_modT2\_star\_threshold=0.3\_warpResolution=2mm  
r=0.08 Z=2.0 P=0.994 N=684 Z2=-0.3 P2=1.000 N=353 Z3=0.3 P3=1.000 N=343 REP=0.79 210 ADM\_mean\_intensity\_modDTI\_FA\_threshold=0.3\_warpResolution=2mm  
r=0.02 Z=0.5 P=1.000 N=685 Z2=0.5 P2=1.000 N=353 Z3=0.5 P3=1.000 N=344 REP=0.89 211 ADM\_95th\_percentile\_modDTI\_FA\_threshold=0.3\_warpResolution=2mm  
r=0.09 Z=2.1 P=1.000 N=684 Z2=0.1 P2=1.000 N=353 Z3=0.1 P3=1.000 N=344 REP=0.81 212 ADM\_gln\_modDTI\_FA\_threshold=0.3\_warpResolution=2mm  
r=0.10 Z=2.5 P=0.987 N=684 Z2=0.1 P2=1.000 N=353 Z3=1.0 P3=1.000 N=343 REP=0.88 213 PIF\_mean\_intensity\_modDTI\_FA\_threshold=0.3\_warpResolution=2mm  
r=0.09 Z=2.6 P=0.987 N=684 Z2=0.1 P2=1.000 N=353 Z3=1.0 P3=1.000 N=343 REP=0.92 214 PIF\_95th\_percentile\_modDTI\_FA\_threshold=0.3\_warpResolution=2mm  
r=0.11 Z=2.8 P=0.984 N=682 Z2=-0.5 P2=1.000 N=351 Z3=0.2 P3=1.000 N=343 REP=0.87 215 PIF\_gln\_modDTI\_FA\_threshold=0.3\_warpResolution=2mm  
r=0.10 Z=2.6 P=0.987 N=684 Z2=0.1 P2=1.000 N=353 Z3=0.8 P3=1.000 N=343 REP=0.86 216 PIF\_mean\_intensity\_modDTI\_FA\_threshold=0.3\_warpResolution=2mm  
r=0.09 Z=2.6 P=0.987 N=684 Z2=0.1 P2=1.000 N=353 Z3=0.8 P3=1.000 N=343 REP=0.92 217 PIF\_95th\_percentile\_modDTI\_FA\_threshold=0.3\_warpResolution=2mm  
r=0.09 Z=2.4 P=0.958 N=684 Z2=0.2 P2=1.000 N=353 Z3=0.8 P3=1.000 N=343 REP=0.87 218 PIF\_gln\_modDTI\_FA\_threshold=0.3\_warpResolution=2mm  
r=0.07 Z=2.0 P=1.000 N=685 Z2=-0.4 P2=1.000 N=353 Z3=0.3 P3=1.000 N=344 REP=0.82 219 TUB\_mean\_intensity\_modDTI\_FA\_threshold=0.3\_warpResolution=2mm  
r=0.02 Z=0.4 P=1.000 N=686 Z2=0.6 P2=1.000 N=353 Z3=0.6 P3=1.000 N=344 REP=0.85 220 TUB\_95th\_percentile\_modDTI\_FA\_threshold=0.3\_warpResolution=2mm  
r=0.08 Z=2.2 P=0.989 N=685 Z2=-0.8 P2=1.000 N=353 Z3=-0.4 P3=1.000 N=344 REP=0.83 221 TUB\_gln\_modDTI\_FA\_threshold=0.3\_warpResolution=2mm  
r=0.13 Z=3.3 P=0.186 N=679 Z2=-1.4 P2=1.000 N=352 Z3=0.6 P3=1.000 N=338 REP=0.95 222 ADM\_mean\_intensity\_modDTI\_MD\_threshold=0.3\_warpResolution=2mm  
r=0.13 Z=3.3 P=0.186 N=679 Z2=-1.4 P2=1.000 N=352 Z3=0.6 P3=1.000 N=338 REP=0.95 223 ADM\_gln\_modDTI\_MD\_threshold=0.3\_warpResolution=2mm  
r=0.13 Z=3.5 P=0.110 N=677 Z2=-1.2 P2=1.000 N=351 Z3=0.2 P3=1.000 N=337 REP=0.95 224 ADM\_gln\_modDTI\_MD\_threshold=0.3\_warpResolution=2mm  
r=0.13 Z=3.4 P=0.140 N=680 Z2=-1.6 P2=1.000 N=352 Z3=0.8 P3=1.000 N=339 REP=0.96 225 PIF\_mean\_intensity\_modDTI\_MD\_threshold=0.3\_warpResolution=2mm  
r=0.12 Z=3.0 P=0.187 N=681 Z2=-1.4 P2=1.000 N=352 Z3=0.6 P3=1.000 N=340 REP=0.95 226 PIF\_mean\_intensity\_modDTI\_MD\_threshold=0.3\_warpResolution=2mm  
r=0.12 Z=3.0 P=0.187 N=681 Z2=-1.4 P2=1.000 N=352 Z3=0.6 P3=1.000 N=340 REP=0.95 227 PIF\_gln\_modDTI\_MD\_threshold=0.3\_warpResolution=2mm  
r=0.12 Z=3.1 P=0.137 N=678 Z2=-0.7 P2=1.000 N=351 Z3=-0.1 P3=1.000 N=337 REP=0.95 227 PIF\_gln\_modDTI\_MD\_threshold=0.3\_warpResolution=2mm  
r=0.13 Z=3.3 P=0.187 N=681 Z2=-1.4 P2=1.000 N=352 Z3=0.6 P3=1.000 N=340 REP=0.95 228 PIF\_mean\_intensity\_modDTI\_MD\_threshold=0.3\_warpResolution=2mm  
r=0.13 Z=3.4 P=0.136 N=686 Z2=1.0 P2=0.999 N=354 Z3=1.3 P3=1.000 N=344 REP=0.96 229 PIF\_95th\_percentile\_modDTI\_MD\_threshold=0.3\_warpResolution=2mm  
r=0.13 Z=3.5 P=0.090 N=681 Z2=1.0 P2=0.999 N=353 Z3=1.1 P3=1.000 N=340 REP=0.95 231 TUB\_mean\_intensity\_modDTI\_MD\_threshold=0.3\_warpResolution=2mm  
r=0.13 Z=3.5 P=0.090 N=681 Z2=1.0 P2=0.999 N=353 Z3=1.1 P3=1.000 N=340 REP=0.95 232 TUB\_gln\_modDTI\_MD\_threshold=0.3\_warpResolution=2mm  
r=0.13 Z=3.4 P=0.160 N=678 Z2=-1.0 P2=1.000 N=353 Z3=1.0 P3=1.000 N=338 REP=0.94 233 TUB\_gln\_modDTI\_MD\_threshold=0.3\_warpResolution=2mm  
r=0.12 Z=3.2 P=0.210 N=680 Z2=0.8 P2=1.000 N=352 Z3=0.5 P3=1.000 N=339 REP=0.84 234 ADM\_mean\_intensity\_modNODDI\_ICVF\_threshold=0.3\_warpResolution=2mm  
r=0.03 Z=0.2 P=1.000 N=672 Z2=1.3 P2=1.000 N=346 Z3=1.5 P3=1.000 N=337 REP=0.83 235 ADM\_95th\_percentile\_modNODDI\_ICVF\_threshold=0.3\_warpResolution=2mm  
r=0.07 Z=-1.9 P=1.000 N=683 Z2=-0.4 P2=1.000 N=352 Z3=-1.1 P3=1.000 N=343 REP=0.86 236 ADM\_gln\_modNODDI\_ICVF\_threshold=0.3\_warpResolution=2mm  
r=0.09 Z=2.3 P=1.000 N=680 Z2=-0.2 P2=1.000 N=352 Z3=0.1 P3=1.000 N=339 REP=0.85 237 PIF\_mean\_intensity\_modNODDI\_ICVF\_threshold=0.3\_warpResolution=2mm  
r=0.08 Z=2.0 P=1.000 N=685 Z2=1.5 P2=1.000 N=341 Z3=1.5 P3=1.000 N=335 REP=0.84 238 PIF\_95th\_percentile\_modNODDI\_ICVF\_threshold=0.3\_warpResolution=2mm  
r=0.08 Z=2.0 P=1.000 N=685 Z2=-0.7 P2=1.000 N=352 Z3=-0.3 P3=1.000 N=344 REP=0.84 239 PIF\_gln\_modNODDI\_ICVF\_threshold=0.3\_warpResolution=2mm  
r=0.09 Z=2.4 P=1.000 N=682 Z2=0.6 P2=1.000 N=352 Z3=1.1 P3=1.000 N=341 REP=0.85 240 PIF\_mean\_intensity\_modNODDI\_ICVF\_threshold=0.3\_warpResolution=2mm  
r=0.00 Z=0.0 P=1.000 N=675 Z2=2.6 P2=0.823 N=348 Z3=2.5 P3=0.882 N=339 REP=0.82 241 PIF\_95th\_percentile\_modNODDI\_ICVF\_threshold=0.3\_warpResolution=2mm  
r=0.06 Z=-1.5 P=1.000 N=682 Z2=0.9 P2=1.000 N=352 Z3=1.1 P3=1.000 N=341 REP=0.86 242 PIF\_gln\_modNODDI\_ICVF\_threshold=0.3\_warpResolution=2mm  
r=0.08 Z=2.6 P=0.976 N=682 Z2=1.0 P2=1.000 N=352 Z3=1.0 P3=1.000 N=341 REP=0.83 243 TUB\_mean\_intensity\_modNODDI\_ICVF\_threshold=0.3\_warpResolution=2mm  
r=0.02 Z=0.4 P=1.000 N=672 Z2=1.9 P2=0.999 N=346 Z3=2.1 P3=0.996 N=338 REP=0.85 244 TUB\_95th\_percentile\_modNODDI\_ICVF\_threshold=0.3\_warpResolution=2mm  
r=0.05 Z=2.4 P=1.000 N=681 Z2=-0.5 P2=1.000 N=351 Z3=-0.3 P3=1.000 N=342 REP=0.88 245 TUB\_gln\_modNODDI\_ICVF\_threshold=0.3\_warpResolution=2mm  
r=0.10 Z=2.7 P=0.764 N=682 Z2=1.7 P2=1.000 N=353 Z3=0.9 P3=1.000 N=341 REP=0.95 246 ADM\_mean\_intensity\_modNODDI\_ICVF\_threshold=0.3\_warpResolution=2mm  
r=0.08 Z=2.2 P=0.990 N=686 Z2=1.2 P2=1.000 N=354 Z3=0.4 P3=1.000 N=344 REP=0.95 247 ADM\_95th\_percentile\_modNODDI\_ICVF\_threshold=0.3\_warpResolution=2mm  
r=0.11 Z=2.8 P=0.995 N=678 Z2=1.2 P2=1.000 N=351 Z3=0.3 P3=1.000 N=338 REP=0.94 248 ADM\_gln\_modNODDI\_ICVF\_threshold=0.3\_warpResolution=2mm  
r=0.11 Z=2.8 P=0.995 N=678 Z2=1.2 P2=1.000 N=351 Z3=0.3 P3=1.000 N=338 REP=0.95 249 PIF\_mean\_intensity\_modNODDI\_ICVF\_threshold=0.3\_warpResolution=2mm  
r=0.10 Z=2.5 P=0.984 N=637 Z2=-1.2 P2=1.000 N=337 Z3=0.7 P3=1.000 N=332 REP=0.93 250 PIF\_95th\_percentile\_modNODDI\_ICVF\_threshold=0.3\_warpResolution=2mm  
r=0.11 Z=2.8 P=0.987 N=683 Z2=1.2 P2=1.000 N=353 Z3=0.4 P3=1.000 N=342 REP=0.95 251 PIF\_gln\_modNODDI\_ICVF\_threshold=0.3\_warpResolution=2mm  
r=0.10 Z=2.7 P=0.764 N=682 Z2=1.6 P2=1.000 N=353 Z3=0.9 P3=1.000 N=341 REP=0.95 252 PIF\_mean\_intensity\_modNODDI\_ICVF\_threshold=0.3\_warpResolution=2mm  
r=0.10 Z=2.5 P=0.986 N=686 Z2=1.2 P2=1.000 N=354 Z3=0.5 P3=1.000 N=344 REP=0.95 253 PIF\_95th\_percentile\_modNODDI\_ICVF\_threshold=0.3\_warpResolution=2mm  
r=0.11 Z=2.9 P=0.555 N=683 Z2=1.7 P2=1.000 N=353 Z3=0.8 P3=1.000 N=342 REP=0.95 254 PIF\_gln\_modNODDI\_ICVF\_threshold=0.3\_warpResolution=2mm  
r=0.09 Z=2.4 P=0.971 N=682 Z2=1.0 P2=1.000 N=354 Z3=0.9 P3=1.000 N=340 REP=0.95 255 TUB\_mean\_intensity\_modNODDI\_ICVF\_threshold=0.3\_warpResolution=2mm  
r=0.11 Z=2.8 P=0.614 N=684 Z2=0.7 P2=1.000 N=354 Z3=0.2 P3=1.000 N=342 REP=0.95 256 TUB\_95th\_percentile\_modNODDI\_ICVF\_threshold=0.3\_warpResolution=2mm  
r=0.11 Z=2.8 P=0.614 N=684 Z2=0.7 P2=1.000 N=354 Z3=0.2 P3=1.000 N=342 REP=0.95 257 TUB\_gln\_modNODDI\_ICVF\_threshold=0.3\_warpResolution=2mm  
r=0.13 Z=3.4 P=1.000 N=683 Z2=1.5 P2=1.000 N=354 Z3=0.4 P3=1.000 N=341 REP=0.86 258 ADM\_mean\_intensity\_modNODDI\_ICVF\_threshold=0.3\_warpResolution=2mm  
r=0.04 Z=1.1 P=1.000 N=686 Z2=0.8 P2=1.000 N=354 Z3=0.8 P3=1.000 N=344 REP=0.91 259 ADM\_95th\_percentile\_modNODDI\_ICVF\_threshold=0.3\_warpResolution=2mm  
r=0.09 Z=2.4 P=0.976 N=682 Z2=0.8 P2=1.000 N=353 Z3=0.4 P3=1.000 N=341 REP=0.86 260 ADM\_gln\_modNODDI\_ICVF\_threshold=0.3\_warpResolution=2mm  
r=0.11 Z=2.9 P=0.580 N=682 Z2=1.0 P2=1.000 N=354 Z3=0.8 P3=1.000 N=340 REP=0.88 261 PIF\_mean\_intensity\_modNODDI\_ICVF\_threshold=0.3\_warpResolution=2mm  
r=0.04 Z=1.1 P=1.000 N=685 Z2=0.2 P2=1.000 N=353 Z3=0.5 P3=1.000 N=344 REP=0.87 262 PIF\_95th\_percentile\_modNODDI\_ICVF\_threshold=0.3\_warpResolution=2mm  
r=0.09 Z=2.4 P=0.976 N=682 Z2=0.8 P2=1.000 N=353 Z3=0.4 P3=1.000 N=341 REP=0.86 263 PIF\_gln\_modNODDI\_ICVF\_threshold=0.3\_warpResolution=2mm  
r=0.12 Z=3.2 P=0.263 N=683 Z2=1.4 P2=1.000 N=354 Z3=0.3 P3=1.000 N=341 REP=0.86 264 PIF\_mean\_intensity\_modNODDI\_ICVF\_threshold=0.3\_warpResolution=2mm  
r=0.14 Z=3.6 P=0.089 N=682 Z2=1.7 P2=1.000 N=354 Z3=0.5 P3=1.000 N=340 REP=0.84 265 PIF\_gln\_modNODDI\_ICVF\_threshold=0.3\_warpResolution=2mm  
r=0.02 Z=0.2 P=1.000 N=683 Z2=1.0 P2=1.000 N=354 Z3=0.4 P3=1.000 N=341 REP=0.88 266 TUB\_mean\_intensity\_modNODDI\_ICVF\_threshold=0.3\_warpResolution=2mm  
r=0.07 Z=1.9 P=1.000 N=686 Z2=0.5 P2=1.000 N=354 Z3=0.1 P3=1.000 N=344 REP=0.91 267 TUB\_95th\_percentile\_modNODDI\_ICVF\_threshold=0.3\_warpResolution=2mm  
r=0.11 Z=2.9 P=0.561 N=683 Z2=1.1 P2=1.000 N=354 Z3=0.2 P3=1.000 N=341 REP=0.85 268 TUB\_gln\_modNODDI\_ICVF\_threshold=0.3\_warpResolution=2mm  
r=0.05 Z=2.3 P=1.000 N=751 Z2=-0.6 P2=1.000 N=382 Z3=-0.4 P3=1.000 N=382 REP=0.94 269 ADM\_T1\_MNI\_gln\_modT1\_MNI\_GM\_mod\_threshold=0.3\_warpResolution=2mm  
r=0.05 Z=-1.3 P=1.000 N=752 Z2=-0.2 P2=1.000 N=382 Z3=0.5 P3=1.000 N=383 REP=0.93 270 ADM\_T1\_MNI\_gln\_modT1\_MNI\_GM\_mod\_threshold=0.3\_warpResolution=2mm  
r=0.04 Z=-1.2 P=1.000 N=751 Z2=-1.0 P2=1.000 N=382 Z3=-0.3 P3=1.000 N=381 REP=0.94 271 PIF\_T1\_MNI\_gln\_modT1\_MNI\_GM\_mod\_threshold=0.3\_warpResolution=2mm  
r=0.04 Z=-1.2 P=1.000 N=751 Z2=-0.7 P2=1.000 N=382 Z3=0.0 P3=1.000 N=381 REP=0.93 272 PIF\_T1\_MNI\_gln\_modT1\_MNI\_GM\_mod\_threshold=0.3\_warpResolution=2mm  
r=0.06 Z=-1.7 P=1.000 N=752 Z2=-3.0 P2=0.525 N=383 Z3=-2.4 P3=0.950 N=382 REP=0.95 273 PIF\_T1\_MNI\_gln\_modT1\_MNI\_GM\_mod\_threshold=0.3\_warpResolution=2mm  
r=0.06 Z=-1.6 P=1.000 N=751 Z2=-2.6 P2=0.651 N=382 Z3=-2.1 P3=0.991 N=382 REP=0.95 274 PIF\_T1\_MNI\_gln\_modT1\_MNI\_GM\_mod\_threshold=0.3\_warpResolution=2mm  
r=0.05 Z=-1.3 P=1.000 N=750 Z2=-0.4 P2=1.000 N=382 Z3=0.1 P3=1.000 N=379 REP=0.94 275 TUB\_T1\_MNI\_gln\_modT1\_MNI\_GM\_mod\_threshold=0.3\_warpResolution=2mm  
r=0.05 Z=-1.4 P=1.000 N=751 Z2=0.2 P2=1.000 N=383 Z3=0.9 P3=1.000 N=381 REP=0.94 276 TUB\_T1\_MNI\_gln\_modT1\_MNI\_GM\_mod\_threshold=0.3\_warpResolution=2mm  
r=0.01 Z=0.2 P=1.000 N=754 Z2=0.7 P2=1.000 N=383 Z3=1.8 P3=1.000 N=385 REP=0.77 277 OC\_MNI\_2mm\_modT1\_MNI\_GM\_mod\_threshold=0.3\_warpResolution=2mm  
r=0.00 Z=0.0 P=1.000 N=613 Z2=-0.3 P2=1.000 N=318 Z3=0.4 P3=1.000 N=304 REP=0.84 278 OSH\_L\_CAU  
r=0.01 Z=-0.2 P=1.000 N=615 Z2=-1.1 P2=1.000 N=317 Z3=-1.2 P3=1.000 N=307 REP=0.86 279 OSH\_R\_CAU  
r=0.05 Z=1.3 P=1.000 N=614 Z2=0.1 P2=1.000 N=318 Z3=0.1 P3=1.000 N=308 REP=0.90 280 OSH\_L\_PUT  
r=0.03 Z=0.7 P=1.000 N=612 Z2=-0.1 P2=1.000 N=318 Z3=0.3 P3=1.000 N=303 REP=0.90 281 OSH\_R\_PUT  
r=0.05 Z=-1.3 P=1.000 N=614 Z2=-2.7 P2=0.774 N=316 Z3=-2.3 P3=0.979 N=307 REP=0.88 282 OSH\_PAL  
r=0.09 Z=2.2 P=0.991 N=610 Z2=-0.1 P2=1.000 N=319 Z3=0.7 P3=1.000 N=308 REP=0.83 283 OSH\_PAL  
r=0.05 Z=1.2 P=1.000 N=612 Z2=0.9 P2=1.000 N=317 Z3=-1.4 P3=1.000 N=304 REP=0.56 284 OSH\_L\_HIPPO  
r=0.08 Z=1.9 P=1.000 N=611 Z2=1.5 P2=1.000 N=317 Z3=1.0 P3=1.000 N=303 REP=0.57 285 OSH\_R\_HIPPO  
r=0.05 Z=1.5 P=1.000 N=614 Z2=0.6 P2=1.000 N=318 Z3=0.2 P3=0.999 N=305 REP=0.80 286 OSH\_L\_SN  
r=0.05 Z=1.3 P=1.000 N=613 Z2=0.7 P2=1.000 N=319 Z3=-1.2 P3=1.000 N=303 REP=0.81 287 OSH\_R\_SN  
r=0.03 Z=0.8 P=1.000 N=633 Z2=1.2 P2=1.000 N=338 Z3=1.9 P3=1.000 N=332 REP=0.61 288 T2starCorrected\_L\_CAU  
r=0.02 Z=0.5 P=1.000 N=638 Z2=0.2 P2=1.000 N=336 Z3=0.1 P3=1.000 N=333 REP=0.57 289 T2starCorrected\_R\_CAU  
r=0.03 Z=0.8 P=1.000 N=637 Z2=0.3 P2=1.000 N=332 Z3=1.0 P3=1.000 N=334 REP=0.67 290 T2starCorrected\_L\_PUT  
r=0.02 Z=0.4 P=1.000 N=635 Z2=0.0 P2=1.000 N=332 Z3=-0.3 P3=1.000 N=332 REP=0.80 291 T2starCorrected\_R\_PUT  
r=0.04 Z=-1.0 P=1.000 N=631 Z2=-1.0 P2=1.000 N=329 Z3=-0.5 P3=1.000 N=311 REP=0.68 292 T2starCorrected\_L\_PAL  
r=0.03 Z=0.2 P=1.000 N=627 Z2=-1.0 P2=1.000 N=327 Z3=-1.0 P3=1.000 N=309 REP=0.72 293 T2starCorrected\_R\_PAL  
r=0.01 Z=0.7 P=1.000 N=573 Z2=-1.3 P2=1.000 N=292 Z3=0.7 P3=1.000 N=298 REP=0.53 294 T2starCorrected\_L\_HIPPO  
r=0.01 Z=0.2 P=1.000 N=586 Z2=-0.1 P2=1.000 N=301 Z3=0.0 P3=1.000 N=294 REP=0.51 295 T2starCorrected\_R\_HIPPO  
r=0.05 Z=-1.1 P=1.000 N=599 Z2=-0.8 P2=1.000 N=308 Z3=-0.2 P3=1.000 N=300 REP=0.51 296 T2starCorrected\_L\_AMG  
r=0.02 Z=0.5 P=1.000 N=600 Z2=-0.2 P2=1.000 N=311 Z3=0.2 P3=1.000 N=298 REP=0.58 297 T2starCorrected\_R\_AMG
