# Supplementary material for: SARS-CoV-2 is associated with changes in brain structure in UK Biobank
Source: bioRxiv or medRxiv preprint supplement (doi:10.1101/2021.06.11.21258690), 2022-03-02
Supplement: Supplementary file [file media-2.pdf]

rr-0.01 Z=-0.4 P=1.000 N=692 Z2=-0.7 P2=1.000 N=349 Z3=-0.5 P3=1.000 N=357 REP=0.53 1959 NODDI\_00\_rh.hippocAmy\_CAD-body  
rr-0.05 Z=-1.7 P=1.000 N=650 Z2=-1.2 P2=1.000 N=349 Z3=0.9 P3=1.000 N=355 REP=0.69 1960 NODDI\_00\_rh.hippocAmy\_GC-ML-DG-head  
rr-0.03 Z=-0.8 P=1.000 N=687 Z2=-1.5 P2=1.000 N=346 Z3=-1.0 P3=1.000 N=354 REP=0.69 1961 NODDI\_00\_rh.hippocAmy\_GC-ML-DG-head  
rr-0.03 Z=-0.7 P=1.000 N=688 Z2=-0.8 P2=1.000 N=346 Z3=-0.3 P3=1.000 N=354 REP=0.55 1962 NODDI\_00\_rh.hippocAmy\_GC-ML-DG-body  
rr-0.05 Z=-1.2 P=1.000 N=692 Z2=-0.1 P2=1.000 N=349 Z3=-0.4 P3=1.000 N=357 REP=0.55 1963 NODDI\_00\_rh.hippocAmy\_GC-ML-DG-body  
rr-0.01 Z=-0.3 P=1.000 N=691 Z2=-1.3 P2=1.000 N=348 Z3=-1.0 P3=1.000 N=357 REP=0.69 1964 NODDI\_00\_rh.hippocAmy\_molecular\_layer\_HP-head  
rr-0.01 Z=-0.2 P=1.000 N=691 Z2=-2.1 P2=1.000 N=348 Z3=-2.0 P3=1.000 N=357 REP=0.66 1965 NODDI\_00\_rh.hippocAmy\_molecular\_layer\_HP-head  
rr-0.01 Z=-0.3 P=1.000 N=690 Z2=0.2 P2=1.000 N=349 Z3=0.3 P3=1.000 N=355 REP=0.58 1966 NODDI\_00\_rh.hippocAmy\_molecular\_layer\_HP-body  
rr-0.03 Z=-0.7 P=1.000 N=684 Z2=-0.3 P2=1.000 N=346 Z3=-1.1 P3=1.000 N=352 REP=0.63 1967 NODDI\_00\_rh.hippocAmy\_molecular\_layer\_HP-body  
rr-0.02 Z=-0.7 P=1.000 N=691 Z2=-0.5 P2=1.000 N=348 Z3=-0.9 P3=1.000 N=357 REP=0.89 1968 NODDI\_00\_rh.hippocAmy\_Lateral-nucleus  
rr-0.07 Z=-1.7 P=1.000 N=686 Z2=-1.8 P2=1.000 N=346 Z3=-1.3 P3=1.000 N=354 REP=0.90 1969 NODDI\_00\_rh.hippocAmy\_Lateral-nucleus  
rr-0.00 Z=-0.0 P=1.000 N=691 Z2=-0.0 P2=1.000 N=349 Z3=-0.1 P3=1.000 N=356 REP=0.81 1970 NODDI\_00\_rh.hippocAmy\_Basal-nucleus  
rr-0.04 Z=-0.9 P=1.000 N=690 Z2=-1.5 P2=1.000 N=348 Z3=-1.9 P3=1.000 N=354 REP=0.78 1971 NODDI\_00\_rh.hippocAmy\_Basal-nucleus  
rr-0.05 Z=-1.4 P=1.000 N=692 Z2=-1.0 P2=1.000 N=346 Z3=-0.1 P3=1.000 N=356 REP=0.52 1972 NODDI\_00\_rh.hippocAmy\_Central-nucleus  
rr-0.05 Z=-1.5 P=1.000 N=687 Z2=-1.0 P2=1.000 N=346 Z3=-0.3 P3=1.000 N=355 REP=0.56 1973 NODDI\_00\_rh.hippocAmy\_Central-nucleus  
rr-0.00 Z=-0.0 P=1.000 N=690 Z2=-1.2 P2=1.000 N=348 Z3=-1.9 P3=1.000 N=356 REP=0.57 1974 NODDI\_00\_rh.hippocAmy\_Cortical-nucleus  
rr-0.03 Z=-0.6 P=1.000 N=689 Z2=-0.6 P2=1.000 N=349 Z3=-0.4 P3=1.000 N=356 REP=0.61 1975 NODDI\_00\_rh.hippocAmy\_Cortical-nucleus  
rr-0.00 Z=-0.0 P=1.000 N=689 Z2=-0.3 P2=1.000 N=348 Z3=-0.3 P3=1.000 N=355 REP=0.63 1976 NODDI\_00\_rh.hippocAmy\_Accessory-Basal-nucleus  
rr-0.04 Z=-1.2 P=1.000 N=689 Z2=-1.0 P2=1.000 N=346 Z3=0.7 P3=1.000 N=357 REP=0.63 1977 NODDI\_00\_rh.hippocAmy\_Corticoamygdaloid-transitio  
rr-0.01 Z=-0.3 P=1.000 N=692 Z2=-0.3 P2=1.000 N=349 Z3=-0.3 P3=1.000 N=357 REP=0.56 1978 NODDI\_00\_rh.hippocAmy\_Corticoamygdaloid-transitio  
rr-0.07 Z=-1.6 P=1.000 N=620 Z2=-1.2 P2=1.000 N=311 Z3=-1.9 P3=1.000 N=321 REP=0.52 1979 NODDI\_00\_rh.hippocAmy\_Anterior-amygdaloid-area-AAA  
rr-0.05 Z=-1.5 P=1.000 N=572 Z2=-0.9 P2=1.000 N=390 Z3=0.4 P3=1.000 N=294 REP=0.55 1980 NODDI\_00\_rh.hippocAmy\_Anterior-amygdaloid-area-AAA  
rr-0.06 Z=-1.5 P=1.000 N=692 Z2=-0.4 P2=1.000 N=349 Z3=-0.0 P3=1.000 N=357 REP=0.68 1981 NODDI\_00\_rh.hippocAmy\_Paralaminar-nucleus  
rr-0.01 Z=-0.3 P=1.000 N=689 Z2=-2.1 P2=1.000 N=349 Z3=-2.0 P3=1.000 N=354 REP=0.63 1982 NODDI\_00\_rh.hippocAmy\_Paralaminar-nucleus  
rr-0.03 Z=-0.8 P=1.000 N=680 Z2=-0.3 P2=1.000 N=348 Z3=-0.6 P3=1.000 N=354 REP=0.76 1983 NODDI\_00\_rh.hippocAmy\_ThalamicNuclei\_Left-AV  
rr-0.01 Z=-0.3 P=1.000 N=682 Z2=-0.0 P2=1.000 N=346 Z3=-0.1 P3=1.000 N=350 REP=0.64 1984 NODDI\_00\_rh.hippocAmy\_ThalamicNuclei\_Left-CeM  
rr-0.09 Z=-2.3 P=1.000 N=688 Z2=-1.0 P2=1.000 N=334 Z3=-0.6 P3=1.000 N=348 REP=0.51 1985 NODDI\_00\_rh.hippocAmy\_ThalamicNuclei\_Left-CM  
rr-0.01 Z=-0.4 P=1.000 N=690 Z2=-2.2 P2=1.000 N=347 Z3=0.3 P3=1.000 N=357 REP=0.87 1986 NODDI\_00\_rh.hippocAmy\_ThalamicNuclei\_Left-CM  
rr-0.10 Z=-1.5 P=1.000 N=659 Z2=-1.5 P2=1.000 N=333 Z3=-1.0 P3=1.000 N=340 REP=0.66 1987 NODDI\_00\_rh.hippocAmy\_ThalamicNuclei\_Left-ID  
rr-0.01 Z=-0.2 P=1.000 N=681 Z2=-0.1 P2=1.000 N=342 Z3=-0.2 P3=1.000 N=353 REP=0.70 1988 NODDI\_00\_rh.hippocAmy\_ThalamicNuclei\_Left-LGN  
rr-0.03 Z=-0.0 P=1.000 N=685 Z2=0.0 P2=1.000 N=345 Z3=0.3 P3=1.000 N=354 REP=0.69 1989 NODDI\_00\_rh.hippocAmy\_ThalamicNuclei\_Left-IP  
rr-0.03 Z=-0.5 P=1.000 N=690 Z2=-0.8 P2=1.000 N=349 Z3=-0.7 P3=1.000 N=355 REP=0.51 1990 NODDI\_00\_rh.hippocAmy\_ThalamicNuclei\_Left-L-5g  
rr-0.03 Z=-0.9 P=1.000 N=690 Z2=-0.5 P2=1.000 N=347 Z3=-0.9 P3=1.000 N=357 REP=0.84 1991 NODDI\_00\_rh.hippocAmy\_ThalamicNuclei\_Left-MDI  
rr-0.01 Z=-0.7 P=1.000 N=688 Z2=-1.2 P2=1.000 N=348 Z3=0.9 P3=1.000 N=354 REP=0.62 1992 NODDI\_00\_rh.hippocAmy\_ThalamicNuclei\_Left-MwE  
rr-0.04 Z=-1.1 P=1.000 N=685 Z2=0.1 P2=1.000 N=344 Z3=0.5 P3=1.000 N=355 REP=0.79 1993 NODDI\_00\_rh.hippocAmy\_ThalamicNuclei\_Left-MGN  
rr-0.01 Z=-0.2 P=1.000 N=612 Z2=0.4 P2=1.000 N=357 Z3=0.3 P3=1.000 N=357 REP=0.61 1994 NODDI\_00\_rh.hippocAmy\_ThalamicNuclei\_Left-Pe  
rr-0.03 Z=-0.7 P=1.000 N=692 Z2=-1.0 P2=1.000 N=349 Z3=-0.8 P3=1.000 N=357 REP=0.69 1995 NODDI\_00\_rh.hippocAmy\_ThalamicNuclei\_Left-PF  
rr-0.05 Z=-1.3 P=1.000 N=691 Z2=-0.0 P2=1.000 N=348 Z3=0.4 P3=1.000 N=357 REP=0.75 1996 NODDI\_00\_rh.hippocAmy\_ThalamicNuclei\_Left-PuA  
rr-0.02 Z=-0.6 P=1.000 N=680 Z2=-0.1 P2=1.000 N=348 Z3=-0.0 P3=1.000 N=354 REP=0.79 1997 NODDI\_00\_rh.hippocAmy\_ThalamicNuclei\_Left-PuI  
rr-0.06 Z=-1.7 P=1.000 N=692 Z2=-1.0 P2=1.000 N=349 Z3=-0.5 P3=1.000 N=357 REP=0.73 1998 NODDI\_00\_rh.hippocAmy\_ThalamicNuclei\_Left-PuL  
rr-0.02 Z=-0.5 P=1.000 N=691 Z2=0.6 P2=1.000 N=349 Z3=0.2 P3=1.000 N=356 REP=0.80 1999 NODDI\_00\_rh.hippocAmy\_ThalamicNuclei\_Left-PuM  
rr-0.01 Z=-0.2 P=1.000 N=689 Z2=-1.0 P2=1.000 N=348 Z3=-1.1 P3=1.000 N=355 REP=0.71 2000 NODDI\_00\_rh.hippocAmy\_ThalamicNuclei\_Left-VA  
rr-0.00 Z=-0.1 P=1.000 N=692 Z2=-0.9 P2=1.000 N=349 Z3=-1.1 P3=1.000 N=357 REP=0.74 2001 NODDI\_00\_rh.hippocAmy\_ThalamicNuclei\_Left-Via  
rr-0.02 Z=-0.4 P=1.000 N=690 Z2=-1.4 P2=1.000 N=349 Z3=-1.3 P3=1.000 N=355 REP=0.84 2002 NODDI\_00\_rh.hippocAmy\_ThalamicNuclei\_Left-Vlp  
rr-0.04 Z=-1.0 P=1.000 N=690 Z2=-0.6 P2=1.000 N=348 Z3=-0.5 P3=1.000 N=356 REP=0.86 2003 NODDI\_00\_rh.hippocAmy\_ThalamicNuclei\_Left-VPL  
rr-0.01 Z=-0.4 P=1.000 N=689 Z2=-1.2 P2=1.000 N=349 Z3=-1.3 P3=1.000 N=354 REP=0.77 2004 NODDI\_00\_rh.hippocAmy\_ThalamicNuclei\_Right-AV  
rr-0.01 Z=-0.2 P=1.000 N=685 Z2=-0.3 P2=1.000 N=346 Z3=-0.5 P3=1.000 N=353 REP=0.66 2005 NODDI\_00\_rh.hippocAmy\_ThalamicNuclei\_Right-CeM  
rr-0.02 Z=-0.5 P=1.000 N=691 Z2=-0.9 P2=1.000 N=348 Z3=-0.8 P3=1.000 N=357 REP=0.66 2006 NODDI\_00\_rh.hippocAmy\_ThalamicNuclei\_Right-CM  
rr-0.05 Z=-1.2 P=1.000 N=661 Z2=-0.4 P2=1.000 N=330 Z3=-1.1 P3=1.000 N=344 REP=0.64 2007 NODDI\_00\_rh.hippocAmy\_ThalamicNuclei\_Right-ID  
rr-0.00 Z=-0.1 P=1.000 N=682 Z2=0.0 P2=1.000 N=345 Z3=-1.2 P3=1.000 N=351 REP=0.70 2008 NODDI\_00\_rh.hippocAmy\_ThalamicNuclei\_Right-LGN  
rr-0.01 Z=-0.3 P=1.000 N=686 Z2=0.0 P2=1.000 N=346 Z3=0.3 P3=1.000 N=354 REP=0.72 2009 NODDI\_00\_rh.hippocAmy\_ThalamicNuclei\_Right-IP  
rr-0.02 Z=-0.6 P=1.000 N=692 Z2=-0.7 P2=1.000 N=349 Z3=0.2 P3=1.000 N=357 REP=0.84 2010 NODDI\_00\_rh.hippocAmy\_ThalamicNuclei\_Right-MDI  
rr-0.04 Z=-0.9 P=1.000 N=691 Z2=-0.3 P2=1.000 N=349 Z3=0.4 P3=1.000 N=356 REP=0.83 2011 NODDI\_00\_rh.hippocAmy\_ThalamicNuclei\_Right-MwE  
rr-0.03 Z=-0.7 P=1.000 N=686 Z2=-0.7 P2=1.000 N=343 Z3=-1.4 P3=1.000 N=356 REP=0.80 2012 NODDI\_00\_rh.hippocAmy\_ThalamicNuclei\_Right-MGN  
rr-0.04 Z=-1.0 P=1.000 N=690 Z2=-0.8 P2=1.000 N=348 Z3=-0.4 P3=1.000 N=356 REP=0.71 2013 NODDI\_00\_rh.hippocAmy\_ThalamicNuclei\_Right-PF  
rr-0.02 Z=-0.6 P=1.000 N=691 Z2=-0.4 P2=1.000 N=348 Z3=-0.7 P3=1.000 N=357 REP=0.79 2014 NODDI\_00\_rh.hippocAmy\_ThalamicNuclei\_Right-PuA  
rr-0.09 Z=-1.4 P=1.000 N=689 Z2=-2.1 P2=1.000 N=347 Z3=-1.0 P3=1.000 N=356 REP=0.80 2015 NODDI\_00\_rh.hippocAmy\_ThalamicNuclei\_Right-PuI  
rr-0.00 Z=-0.1 P=1.000 N=691 Z2=-1.1 P2=1.000 N=348 Z3=-1.3 P3=1.000 N=357 REP=0.72 2016 NODDI\_00\_rh.hippocAmy\_ThalamicNuclei\_Right-PuL  
rr-0.03 Z=-0.8 P=1.000 N=692 Z2=-0.1 P2=1.000 N=349 Z3=-0.3 P3=1.000 N=357 REP=0.81 2017 NODDI\_00\_rh.hippocAmy\_ThalamicNuclei\_Right-PuM  
rr-0.02 Z=-0.5 P=1.000 N=684 Z2=-0.1 P2=1.000 N=348 Z3=0.1 P3=1.000 N=349 REP=0.78 2018 NODDI\_00\_rh.hippocAmy\_ThalamicNuclei\_Right-VA  
rr-0.03 Z=-0.5 P=1.000 N=690 Z2=-1.3 P2=1.000 N=349 Z3=-1.1 P3=1.000 N=355 REP=0.76 2019 NODDI\_00\_rh.hippocAmy\_ThalamicNuclei\_Right-Vla  
rr-0.01 Z=-0.4 P=1.000 N=692 Z2=-0.3 P2=1.000 N=349 Z3=-0.0 P3=1.000 N=357 REP=0.85 2020 NODDI\_00\_rh.hippocAmy\_ThalamicNuclei\_Right-Vlp  
rr-0.01 Z=-0.3 P=1.000 N=691 Z2=0.4 P2=1.000 N=349 Z3=0.2 P3=1.000 N=356 REP=0.85 2021 NODDI\_00\_rh.hippocAmy\_ThalamicNuclei\_Right-VPL  
rr-0.06 Z=-1.6 P=1.000 N=695 Z2=0.5 P2=1.000 N=351 Z3=-0.4 P3=1.000 N=353 REP=0.91 2022 MD\_percc\_90

























r=-0.05 Z=-1.3 P=1.000 N=688 Z2=-0.3 P2=1.000 N=348 Z3=-0.0 P3=1.000 N=354 REP=0.68 1640 dti\_FA\_\_rh.hippoAmyg\_\_HATA  
r=0.85 Z=1.7 P=1.000 N=684 Z2=0.4 P2=1.000 N=345 Z3=0.0 P3=1.000 N=339 REP=0.83 1755 dti\_MD\_\_rh.hippoAmyg\_\_CA3-head  
r=0.03 Z=0.7 P=1.000 N=684 Z2=0.0 P2=1.000 N=346 Z3=-0.0 P3=1.000 N=352 REP=0.72 1739 dti\_MD\_\_rh.hippoAmyg\_\_hippocampal\_fissure  
r=0.02 Z=0.5 P=1.000 N=725 Z2=0.0 P2=1.000 N=372 Z3=-0.0 P3=1.000 N=368 REP=0.61 1520 IDP\_dMRI\_TBSS\_MD\_Fornix\_cres-stria\_terminalis\_R  
r=-0.02 Z=-0.5 P=1.000 N=717 Z2=-0.2 P2=1.000 N=371 Z3=0.0 P3=1.000 N=369 REP=0.56 1414 IDP\_dMRI\_ProbtrackX\_150VF\_gyr\_r  
r=-0.09 Z=-2.3 P=1.000 N=721 Z2=-0.8 P2=1.000 N=367 Z3=-0.0 P3=1.000 N=369 REP=0.89 374 apar-Desikan\_th\_volume\_insula  
r=-0.01 Z=-0.4 P=1.000 N=724 Z2=-0.3 P2=1.000 N=369 Z3=0.0 P3=1.000 N=370 REP=0.78 774 apar-DKtAtlas\_th\_thickness\_caudal\_midlinefrontal  
r=0.01 Z=0.2 P=1.000 N=686 Z2=-0.1 P2=1.000 N=341 Z3=0.0 P3=1.000 N=324 REP=0.51 1688 T2starCorrected\_R\_HIPPO  
r=-0.00 Z=0.0 P=1.000 N=688 Z2=0.0 P2=1.000 N=346 Z3=-0.0 P3=1.000 N=356 REP=0.78 1633 dti\_FA\_\_brainstems\_Midbrain  
r=-0.05 Z=-1.4 P=1.000 N=689 Z2=-0.4 P2=1.000 N=347 Z3=0.0 P3=1.000 N=356 REP=0.62 1927 NODDI\_OD\_\_brainstems\_Pons  
r=0.85 Z=1.3 P=1.000 N=689 Z2=0.7 P2=1.000 N=348 Z3=0.0 P3=1.000 N=355 REP=0.68 1638 dti\_FA\_\_rh.hippoAmyg\_\_Centralnucleus  
r=-0.07 Z=-1.0 P=1.000 N=716 Z2=-0.6 P2=1.000 N=367 Z3=0.0 P3=1.000 N=364 REP=0.92 585 apar-a2089s\_th\_volume\_5-oc-temp-med-Lingual  
r=-0.00 Z=-1.7 P=1.000 N=720 Z2=-0.7 P2=1.000 N=367 Z3=0.0 P3=1.000 N=368 REP=0.92 685 apar-a2089s\_th\_volume\_5-temp-sup-Lateral  
r=-0.07 Z=-2.0 P=1.000 N=721 Z2=-0.6 P2=1.000 N=367 Z3=0.0 P3=1.000 N=369 REP=0.93 482 apar-DKtAtlas\_th\_volume\_parietocorticalis  
r=0.04 Z=1.2 P=1.000 N=729 Z2=0.3 P2=1.000 N=375 Z3=0.0 P3=1.000 N=388 REP=0.86 1136 IDP\_dMRI\_TBSS\_MD\_Body\_of\_corpus\_callosum  
r=0.01 Z=0.3 P=1.000 N=722 Z2=-0.0 P2=1.000 N=372 Z3=0.0 P3=1.000 N=383 REP=0.91 1168 IDP\_dMRI\_TBSS\_MD\_Posterior\_corona\_radiata\_L  
r=-0.03 Z=-0.8 P=1.000 N=710 Z2=-0.5 P2=1.000 N=367 Z3=0.0 P3=1.000 N=367 REP=0.81 798 apar-DKtAtlas\_th\_thickness\_parietotemporalis  
r=-0.02 Z=-0.4 P=1.000 N=774 Z2=-0.5 P2=1.000 N=398 Z3=0.0 P3=1.000 N=398 REP=0.82 132 IDP\_T1\_FAST\_ROIS\_L\_amygdala  
r=0.00 Z=0.1 P=1.000 N=720 Z2=-0.0 P2=1.000 N=378 Z3=0.0 P3=1.000 N=363 REP=0.56 1429 rFMR1\_amplitudes\_ICA25\_node\_17  
r=-0.07 Z=-2.0 P=1.000 N=735 Z2=-0.5 P2=1.000 N=378 Z3=-0.0 P3=1.000 N=372 REP=0.86 1230 IDP\_dMRI\_TBSS\_ICVF\_Anterior\_corona\_radiata\_L  
r=0.02 Z=0.7 P=1.000 N=701 Z2=0.1 P2=1.000 N=402 Z3=0.0 P3=1.000 N=394 REP=0.87 135 IDP\_T1\_FAST\_ROIS\_R\_ventral\_striatum  
r=-0.05 Z=-1.5 P=1.000 N=692 Z2=0.4 P2=1.000 N=349 Z3=-0.0 P3=1.000 N=357 REP=0.68 1901 NODDI\_OD\_\_rh.hippoAmyg\_\_Paralamina-nucleus  
r=-0.07 Z=-1.0 P=1.000 N=721 Z2=-0.9 P2=1.000 N=367 Z3=-0.0 P3=1.000 N=368 REP=0.83 764 apar-DKtAtlas\_th\_thickness\_precuneus  
r=-0.03 Z=-0.6 P=1.000 N=690 Z2=-0.3 P2=1.000 N=349 Z3=0.0 P3=1.000 N=355 REP=0.61 1930 NODDI\_OD\_\_rh.hippoAmyg\_\_parasubiculum  
r=0.00 Z=0.0 P=1.000 N=676 Z2=0.0 P2=1.000 N=341 Z3=0.0 P3=1.000 N=351 REP=0.57 1763 dti\_MD\_\_rh.hippoAmyg\_\_CC-MC-body  
r=0.05 Z=1.3 P=1.000 N=672 Z2=0.5 P2=1.000 N=348 Z3=0.0 P3=1.000 N=346 REP=0.78 1756 dti\_MD\_\_rh.hippoAmyg\_\_CA3-body  
r=-0.03 Z=-0.6 P=1.000 N=778 Z2=-0.4 P2=1.000 N=401 Z3=0.0 P3=1.000 N=392 REP=0.92 75 IDP\_T1\_FAST\_ROIS\_R\_front\_med\_cortex  
r=-0.04 Z=-1.1 P=1.000 N=726 Z2=-0.6 P2=1.000 N=372 Z3=0.0 P3=1.000 N=368 REP=0.62 1448 rFMR1\_amplitudes\_ICA10B\_node\_23  
r=0.01 Z=0.2 P=1.000 N=629 Z2=0.2 P2=1.000 N=324 Z3=0.0 P3=1.000 N=314 REP=0.64 1481 OC\_mean\_intensity\_mod-T2\_star\_threshold=0.3\_warpResolution=2mm  
r=0.02 Z=0.6 P=1.000 N=778 Z2=-0.0 P2=1.000 N=402 Z3=0.0 P3=1.000 N=391 REP=0.88 134 IDP\_T1\_FAST\_ROIS\_L\_ventral\_striatum  
r=-0.07 Z=-1.8 P=1.000 N=722 Z2=-0.6 P2=1.000 N=367 Z3=0.0 P3=1.000 N=378 REP=0.88 619 apar-a2089s\_th\_volume\_5-circular-insula-inf  
r=-0.02 Z=-0.6 P=1.000 N=688 Z2=-0.1 P2=1.000 N=348 Z3=0.0 P3=1.000 N=354 REP=0.79 1997 NODDI\_OD\_\_ThalamusNuclei\_Left-Pui  
r=0.08 Z=2.2 P=1.000 N=686 Z2=0.7 P2=1.000 N=354 Z3=0.0 P3=1.000 N=344 REP=0.95 1558 ADN\_95th\_percentile\_modNODDI\_150VF\_threshold=0\_warpResolution=2mm  
r=-0.03 Z=-0.8 P=1.000 N=723 Z2=-0.7 P2=1.000 N=370 Z3=0.0 P3=1.000 N=368 REP=0.63 237 Hippocampus\_th\_volume\_fimbria  
r=-0.05 Z=-1.3 P=1.000 N=720 Z2=-0.6 P2=1.000 N=367 Z3=0.0 P3=1.000 N=368 REP=0.85 324 ThalamusNuclei\_th\_volume\_CeM  
r=-0.00 Z=-0.1 P=1.000 N=777 Z2=-0.4 P2=1.000 N=399 Z3=0.0 P3=1.000 N=393 REP=0.96 77 IDP\_T1\_FAST\_ROIS\_R\_juxtapes\_Lobule\_cortex  
r=0.01 Z=0.3 P=1.000 N=738 Z2=-0.1 P2=1.000 N=377 Z3=0.0 P3=1.000 N=375 REP=0.94 1473 rFMR1\_connectivity\_ICA-features\_3  
r=-0.02 Z=-0.5 P=1.000 N=653 Z2=-0.3 P2=1.000 N=331 Z3=0.0 P3=1.000 N=332 REP=0.55 1629 T2Star\_\_rh.hippoAmyg\_\_Corticomygdaloid-transitio  
r=-0.04 Z=-1.1 P=1.000 N=723 Z2=-0.3 P2=1.000 N=369 Z3=0.0 P3=1.000 N=369 REP=0.91 193 aseg\_th\_volume\_Thalamus-Proper  
r=-0.02 Z=-0.6 P=1.000 N=723 Z2=-0.3 P2=1.000 N=369 Z3=0.0 P3=1.000 N=369 REP=0.87 598 apar-a2089s\_th\_volume\_6-parietal-sup  
r=0.02 Z=0.4 P=1.000 N=721 Z2=0.1 P2=1.000 N=367 Z3=0.0 P3=1.000 N=369 REP=0.91 241 Hippocampus\_th\_volume\_Hippocampal-tail  
r=0.06 Z=1.5 P=1.000 N=647 Z2=0.9 P2=1.000 N=328 Z3=0.0 P3=1.000 N=329 REP=0.64 1628 T2Star\_\_rh.hippoAmyg\_\_presubiculum-head  
r=-0.01 Z=-0.4 P=1.000 N=776 Z2=0.2 P2=1.000 N=399 Z3=0.0 P3=1.000 N=392 REP=0.91 148 IDP\_T1\_FAST\_ROIS\_V\_cerebellum\_crus\_II  
r=-0.04 Z=-1.0 P=1.000 N=723 Z2=-0.5 P2=1.000 N=369 Z3=0.0 P3=1.000 N=369 REP=0.95 335 ThalamusNuclei\_th\_volume\_Whole-thalamus  
r=0.03 Z=0.8 P=1.000 N=611 Z2=-0.3 P2=1.000 N=315 Z3=0.0 P3=1.000 N=385 REP=0.76 1601 OSM\_MMI  
r=-0.04 Z=-1.2 P=1.000 N=776 Z2=-0.8 P2=1.000 N=399 Z3=0.0 P3=1.000 N=392 REP=0.94 112 IDP\_T1\_FAST\_ROIS\_L\_planum\_polare  
r=-0.01 Z=-0.2 P=1.000 N=674 Z2=-0.3 P2=1.000 N=338 Z3=0.0 P3=1.000 N=358 REP=0.76 1729 dti\_MD\_\_brainstems\_Pons  
r=-0.05 Z=-1.4 P=1.000 N=726 Z2=-0.5 P2=1.000 N=372 Z3=0.0 P3=1.000 N=369 REP=0.59 1337 IDP\_dMRI\_ProbtrackX\_OD\_cah\_r  
r=-0.02 Z=-0.5 P=1.000 N=724 Z2=-0.5 P2=1.000 N=370 Z3=0.0 P3=1.000 N=369 REP=0.91 312 ThalamusNuclei\_th\_volume\_PuM  
r=-0.10 Z=-2.7 P=1.000 N=731 Z2=-0.9 P2=1.000 N=376 Z3=0.0 P3=1.000 N=378 REP=0.87 1224 IDP\_dMRI\_TBSS\_ICVF\_Anterior limb\_of\_internal\_capsule\_L  
r=0.03 Z=0.3 P=1.000 N=717 Z2=0.2 P2=1.000 N=369 Z3=0.0 P3=1.000 N=367 REP=0.87 631 apar-a2089s\_th\_volume\_5-oc-temp-lat  
r=-0.02 Z=-0.5 P=1.000 N=717 Z2=-0.1 P2=1.000 N=367 Z3=0.0 P3=1.000 N=364 REP=0.54 1438 rFMR1\_amplitudes\_ICA25\_node\_18  
r=-0.12 Z=-3.2 P=1.000 N=711 Z2=-1.0 P2=1.000 N=369 Z3=0.0 P3=1.000 N=354 REP=0.86 1249 IDP\_dMRI\_TBSS\_ICVF\_Superior fronto-occipital\_fasciculus\_R  
r=-0.04 Z=-1.2 P=1.000 N=751 Z2=-0.7 P2=1.000 N=382 Z3=0.0 P3=1.000 N=381 REP=0.93 1583 FIF\_T1\_PuM\_alb\_mod-T1\_PuM\_OD\_mod\_threshold=0\_warpResolution=2mm  
r=0.01 Z=0.3 P=1.000 N=778 Z2=-0.2 P2=1.000 N=401 Z3=0.0 P3=1.000 N=392 REP=0.96 67 IDP\_T1\_FAST\_ROIS\_R\_angular\_gyrus  
r=0.11 Z=2.9 P=1.000 N=682 Z2=1.0 P2=1.000 N=354 Z3=0.0 P3=1.000 N=340 REP=0.88 1572 PIF\_mean\_intensity\_modNODDI\_OD\_threshold=0\_warpResolution=2mm  
r=-0.06 Z=-1.5 P=1.000 N=733 Z2=-0.4 P2=1.000 N=376 Z3=0.0 P3=1.000 N=370 REP=0.64 1313 IDP\_dMRI\_TBSS\_ICVF\_Anterior\_corona\_radiata\_R  
r=0.01 Z=0.3 P=1.000 N=656 Z2=0.3 P2=1.000 N=338 Z3=0.0 P3=1.000 N=338 REP=0.59 1770 dti\_MD\_\_rh.hippoAmyg\_\_Basal-nucleus  
r=-0.03 Z=-0.8 P=1.000 N=723 Z2=-0.1 P2=1.000 N=369 Z3=0.0 P3=1.000 N=369 REP=0.91 238 amygdala\_th\_volume\_Whole-amygdala  
r=0.03 Z=0.8 P=1.000 N=735 Z2=0.4 P2=1.000 N=378 Z3=0.0 P3=1.000 N=371 REP=0.79 1196 IDP\_dMRI\_ProbtrackX\_MD\_tif\_r  
r=-0.03 Z=-0.8 P=1.000 N=721 Z2=0.0 P2=1.000 N=367 Z3=0.0 P3=1.000 N=369 REP=0.94 511 apar-a2089s\_th\_volume\_G-front-inf-Triangul  
r=-0.02 Z=-0.6 P=1.000 N=739 Z2=-0.1 P2=1.000 N=380 Z3=0.0 P3=1.000 N=374 REP=0.89 1879 IDP\_dMRI\_TBSS\_FA\_Retrolenticular\_part\_of\_internal\_capsule\_L  
r=0.03 Z=0.9 P=1.000 N=761 Z2=0.3 P2=1.000 N=396 Z3=0.0 P3=1.000 N=385 REP=0.91 124 IDP\_T1\_FAST\_ROIS\_L\_caudate  
r=0.05 Z=1.3 P=1.000 N=688 Z2=0.3 P2=1.000 N=346 Z3=0.0 P3=1.000 N=356 REP=0.55 1851 NODDI\_ICVF\_\_rh.hippoAmyg\_\_parasubiculum
